# Supplementary material for: A PyrR Regulating the Pyrimidine Biosynthesis Lost Antibacterial Ability Using CRISPR/Cas9-Mediated Knock-out for Metabolic Engineering at Lactobacillus casei
Source: Research Square preprint supplement (doi:10.21203/rs.3.rs-2470002/v1), 2023-01-19
Supplement: Supplementary file 1 [file 92ad32d912314c2d549e4080.docx]

Table 3. Bacteriostatic diagram of deleting the *PyrR* gene in *L. casei*

| Bacillus subtilis | *Lactobacillus* culture suspension | |
| --- | --- | --- |
| 200 µL | 100 µL |
| Oxford cup diffusion method | 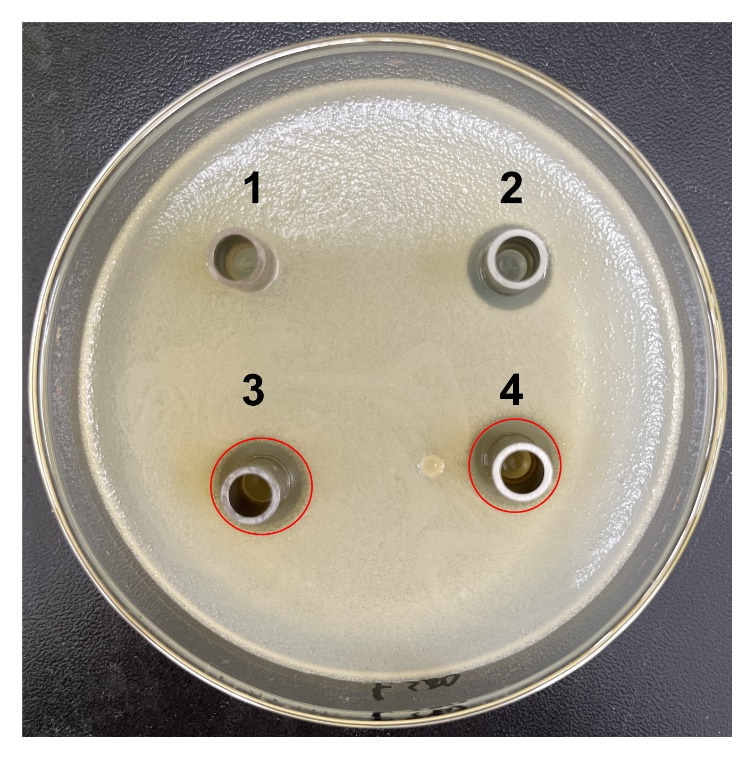 | 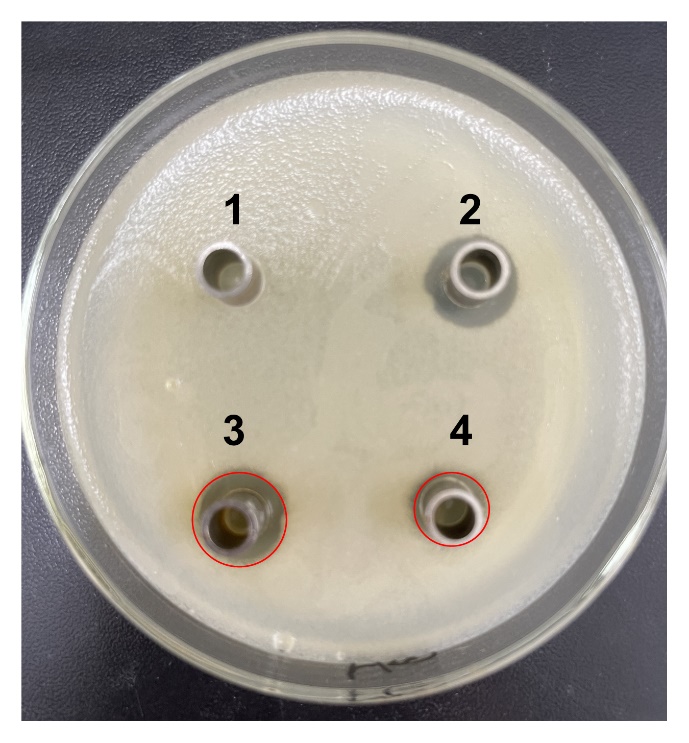 |
| Growth inhibition diameter | 3: 13.56 mm 4: 12.04 mm | 3: 13.40 mm 4: 10.24 mm |

| Staphyloccocus aureus | *Lactobacillus* culture suspension | |
| --- | --- | --- |
| 200 µL | 100 µL |
| Oxford cup diffusion method | 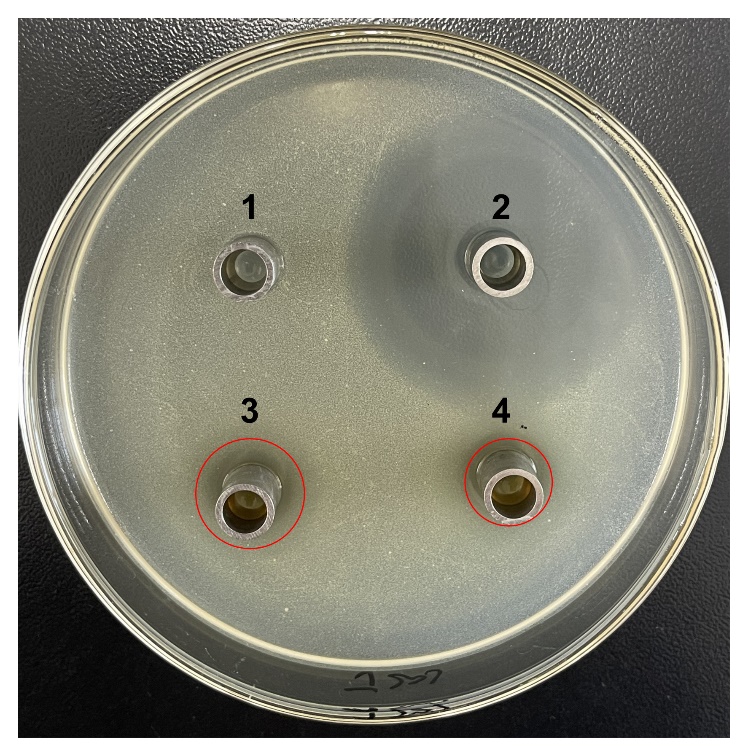 | 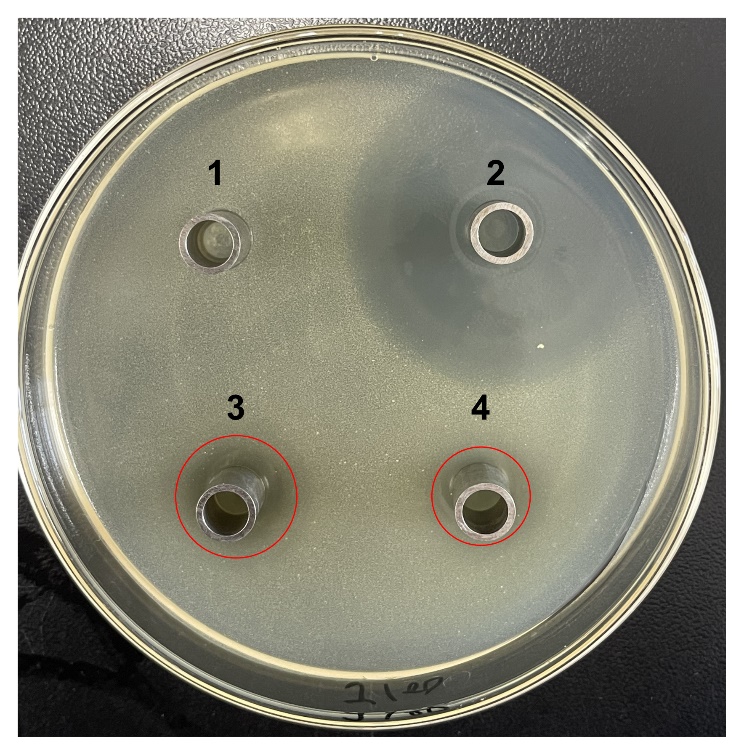 |
| Growth inhibition diameter | 3: 12.36 mm 4: 11.16 mm | 3: 12.32 mm 4: 9.64 mm |

| Salmonella | *Lactobacillus* culture suspension | |
| --- | --- | --- |
| 200 µL | 100 µL |
| Oxford cup diffusion method | 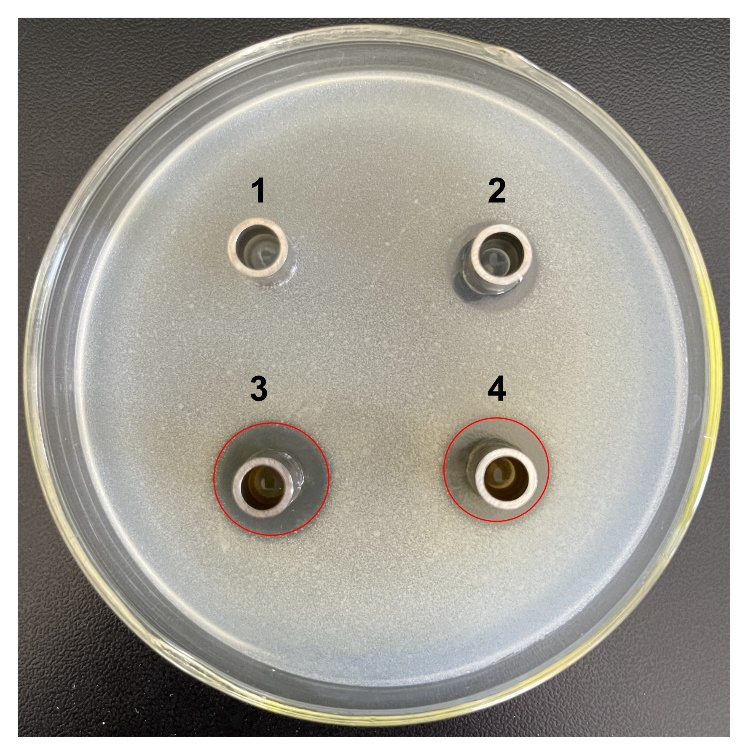 | 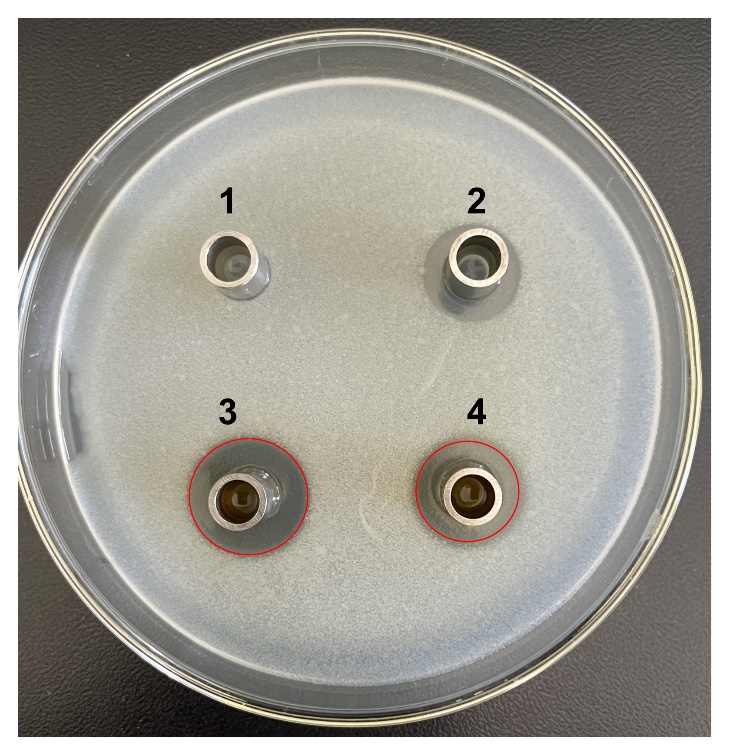 |
| Growth inhibition diameter | 3: 17.92 mm 4: 16.16 mm | 3: 17.00 mm 4: 14.02 mm |

The outer diameter of the Oxford cup is 8 mm. The liquid in the plate were: PBS buffer of negative control group (No. 1), antibiotic of positive control group (No. 2), suspension from *L. casei* (No. 3) and suspension from *L. casei*ΔPyrR (No. 4).
